# Supplementary material for: Assessment of the Effectiveness of a Computerised Decision-Support Tool for Health Professionals for the Prevention and Treatment of Childhood Obesity. Results from a Randomised Controlled Trial
Source: MDPI journal article supplement (doi:10.3390/nu11030706), 2019-03-26
Supplement: s1 [file s1]

## Diet Meal Plan 1

| Day 1 <sup>st</sup>                                                                                                                                                                                                                                                                                                                   | Day 2 <sup>nd</sup>                                                                                                                                                                                                                                                                                                                                                        | Day 3 <sup>rd</sup>                                                                                                                                                                                                                                                                                                                                                       | Day 4 <sup>th</sup>                                                                                                                                                                                                                                                                                  |
|---------------------------------------------------------------------------------------------------------------------------------------------------------------------------------------------------------------------------------------------------------------------------------------------------------------------------------------|----------------------------------------------------------------------------------------------------------------------------------------------------------------------------------------------------------------------------------------------------------------------------------------------------------------------------------------------------------------------------|---------------------------------------------------------------------------------------------------------------------------------------------------------------------------------------------------------------------------------------------------------------------------------------------------------------------------------------------------------------------------|------------------------------------------------------------------------------------------------------------------------------------------------------------------------------------------------------------------------------------------------------------------------------------------------------|
| <b>Breakfast</b> <ul style="list-style-type: none"> <li>1 cup of milk (250ml) 1.5% fat or 1 cup (200g) of yogurt 2% fat</li> <li>½ cup of cereals (preferably whole wheat)</li> </ul>                                                                                                                                                 | <b>Breakfast</b> <ul style="list-style-type: none"> <li>1 cup of milk (250ml) 1.5% fat or 1 cup (200g) of yogurt 2% fat</li> <li>2 rusks (preferably whole wheat) with 2 teaspoons of jam</li> </ul>                                                                                                                                                                       | <b>Breakfast</b> <ul style="list-style-type: none"> <li>1 cup of milk (250ml) 1.5% fat or 1 cup (200g) of yogurt 2% fat</li> <li>2 rusks (preferably whole wheat) with 2 teaspoons of tahini</li> </ul>                                                                                                                                                                   | <b>Breakfast</b> <ul style="list-style-type: none"> <li>1 cup of milk (250ml) 1.5% fat or 1 cup (200g) of yogurt 2% fat</li> <li>½ cup of cereals (preferably whole wheat)</li> </ul>                                                                                                                |
| <b>Morning Snack (school)</b> <ul style="list-style-type: none"> <li>Sandwich with 2 slices of bread (preferably whole wheat) and 1 slice of cheese (low fat) and vegetables (e.g. tomato, lettuce, cucumber) (1<sup>st</sup> break)</li> <li>1 medium sized fruit (2<sup>nd</sup> or 3<sup>rd</sup> break)</li> </ul>                | <b>Morning Snack (school)</b> <ul style="list-style-type: none"> <li>Sandwich with 2 slices of bread (preferably whole wheat) and 1 slice of cheese (low fat) and vegetables (e.g. tomato, lettuce, cucumber) (1<sup>st</sup> break)</li> <li>1 medium sized fruit (2<sup>nd</sup> or 3<sup>rd</sup> break)</li> </ul>                                                     | <b>Morning Snack (school)</b> <ul style="list-style-type: none"> <li>1 round sesame bread (60g) (1<sup>st</sup> break)</li> <li>1 medium sized fruit (2<sup>nd</sup> or 3<sup>rd</sup> break)</li> </ul>                                                                                                                                                                  | <b>Morning Snack (school)</b> <ul style="list-style-type: none"> <li>1 round sesame bread (60g) (1<sup>st</sup> break)</li> <li>1 medium sized fruit (2<sup>nd</sup> or 3<sup>rd</sup> break)</li> </ul>                                                                                             |
| <b>Lunch</b> <ul style="list-style-type: none"> <li>90g chicken's leg without skin cooked with lemon or tomato (homemade tomato sauce) with 1 teaspoon of olive oil</li> <li>1 medium sized baked potato with 1 teaspoon of olive oil</li> <li>Fresh salad made with raw or boiled vegetables with 1 teaspoon of olive oil</li> </ul> | <b>Lunch</b> <ul style="list-style-type: none"> <li>1 cup of pasta cooked with 1 teaspoon of olive oil</li> <li>30g grated cheese (preferably low fat)</li> <li>Fresh salad made with raw or boiled vegetables with 2 teaspoons of olive oil</li> </ul>                                                                                                                    | <b>Lunch</b><br><b>Omelet (ingredients):</b> <ul style="list-style-type: none"> <li>2 eggs</li> <li>Vegetables (e.g. mushrooms, peppers, tomato)</li> <li>1 teaspoon of olive oil</li> <li>1 slice of bread (30g) (preferably whole wheat)</li> <li>Fresh salad made with raw or boiled vegetables with 2 teaspoons of olive oil</li> <li>1 medium sized fruit</li> </ul> | <b>Lunch</b> <ul style="list-style-type: none"> <li>1 cup of bean soup cooked with 2 teaspoons of olive oil</li> <li>30g cheese (low fat)</li> <li>Fresh salad made with raw or boiled vegetables with 1 teaspoon of olive oil</li> </ul>                                                            |
| <b>Afternoon Snack</b> <ul style="list-style-type: none"> <li>1 cup of milk (250ml) 1.5% fat or 1 cup (200g) of yogurt 2% fat</li> <li>1 medium sized fruit</li> </ul>                                                                                                                                                                | <b>Afternoon Snack</b> <ul style="list-style-type: none"> <li>1 cup of milk (250ml) 1.5% fat or 1 cup (200g) of yogurt 2% fat</li> <li>1 medium sized fruit</li> </ul>                                                                                                                                                                                                     | <b>Afternoon Snack</b> <ul style="list-style-type: none"> <li>1 cup of milk (250ml) 1.5% fat or 1 cup (200g) of yogurt 2% fat</li> <li>½ cup of cereals (preferably whole wheat)</li> </ul>                                                                                                                                                                               | <b>Afternoon Snack</b> <ul style="list-style-type: none"> <li>1 cup of milk (250ml) 1.5% fat or 1 cup (200g) of yogurt 2% fat</li> <li>1 medium sized fruit</li> </ul>                                                                                                                               |
| <b>Dinner</b><br><b>Greek Dakos salad (ingredients):</b> <ul style="list-style-type: none"> <li>1 medium sized rusk (60g)</li> <li>30g cheese (low fat)</li> <li>grated or chopped tomato</li> <li>2 teaspoons of olive oil</li> <li>1 medium sized fruit</li> </ul>                                                                  | <b>Dinner</b> <ul style="list-style-type: none"> <li>Caesar's Salad (ingredients): <ul style="list-style-type: none"> <li>plenty of vegetables</li> <li>30g grated cheese (preferably low fat)</li> <li>30g chicken chopped</li> <li>½ cup of croutons</li> <li>2 teaspoons of olive oil or 4 teaspoons of mayonnaise</li> </ul> </li> <li>1 medium sized fruit</li> </ul> | <b>Dinner</b> <ul style="list-style-type: none"> <li>Sandwich with 2 slices of bread (preferably whole wheat) and 1 slice of cheese (low fat) and 1 slice of turkey boiled and vegetables (e.g. Tomato, lettuce, cucumber)</li> <li>1 medium sized fruit</li> </ul>                                                                                                       | <b>Dinner</b><br><b>Chef's salad:</b> <ul style="list-style-type: none"> <li>1 egg boiled</li> <li>30g grated cheese (low fat)</li> <li>30g turkey boiled chopped</li> <li>plenty of vegetables</li> <li>½ cup of croutons</li> <li>2 teaspoons of olive oil or 4 teaspoons of mayonnaise</li> </ul> |
| <b>Before Bedtime</b> <ul style="list-style-type: none"> <li>1 cup of milk (250ml) 1.5% fat or 1 cup (200g) of yogurt 2% fat</li> </ul>                                                                                                                                                                                               | <b>Before Bedtime</b> <ul style="list-style-type: none"> <li>1 cup of milk (250ml) 1.5% fat or 1 cup (200g) of yogurt 2% fat</li> </ul>                                                                                                                                                                                                                                    | <b>Before Bedtime</b> <ul style="list-style-type: none"> <li>1 cup of milk (250ml) 1.5% fat or 1 cup (200g) of yogurt 2% fat</li> </ul>                                                                                                                                                                                                                                   | <b>Before Bedtime</b> <ul style="list-style-type: none"> <li>1 cup of milk (250ml) 1.5% fat or 1 cup (200g) of yogurt 2% fat</li> </ul>                                                                                                                                                              |

## Diet Meal Plan 1

|                                                                                                                                                                                                                                                                                                                     |                                                                                                                                                                                                                                                                          |                                                                                                                                                                                                                                                                                                                                      |
|---------------------------------------------------------------------------------------------------------------------------------------------------------------------------------------------------------------------------------------------------------------------------------------------------------------------|--------------------------------------------------------------------------------------------------------------------------------------------------------------------------------------------------------------------------------------------------------------------------|--------------------------------------------------------------------------------------------------------------------------------------------------------------------------------------------------------------------------------------------------------------------------------------------------------------------------------------|
| <b>Day 5<sup>th</sup></b>                                                                                                                                                                                                                                                                                           | <b>Day 6<sup>th</sup> Weekend</b>                                                                                                                                                                                                                                        | <b>Day 7<sup>th</sup> Weekend</b>                                                                                                                                                                                                                                                                                                    |
| <b>Breakfast</b> <ul style="list-style-type: none"> <li>• 1 cup of milk (250ml) 1.5% fat or 1 cup (200g) of yogurt 2% fat</li> <li>• ½ cup of cereals (preferably whole wheat)</li> </ul>                                                                                                                           | <b>Breakfast</b> <ul style="list-style-type: none"> <li>• 1 cup of milk (250ml) 1.5% fat or 1 cup (200g) of yogurt 2% fat</li> <li>• ½ cup of cereals (preferably whole wheat)</li> </ul>                                                                                | <b>Breakfast</b> <ul style="list-style-type: none"> <li>• 1 cup of milk (250ml) 1.5% fat or 1 cup (200g) of yogurt 2% fat</li> <li>• ½ cup of cereals (preferably whole wheat)</li> </ul>                                                                                                                                            |
| <b>Morning Snack (school)</b> <ul style="list-style-type: none"> <li>• Sandwich with 2 slices of bread (preferably whole wheat) and 1 slice of cheese (low fat) and vegetables (e.g. tomato, lettuce, cucumber) (1st break)</li> <li>• 1 medium sized fruit (2<sup>nd</sup> or 3<sup>rd</sup> break)</li> </ul>     | <b>Morning Snack</b> <ul style="list-style-type: none"> <li>• Sandwich with 2 slices of bread (preferably whole wheat) and 4 teaspoons of tahini</li> <li>• 1 medium sized fruit</li> </ul>                                                                              | <b>Morning Snack</b> <ul style="list-style-type: none"> <li>• Sandwich with 2 slices of bread (preferably whole wheat) and 4 teaspoons of tahini</li> <li>• 1 medium sized fruit</li> </ul>                                                                                                                                          |
| <b>Lunch</b> <ul style="list-style-type: none"> <li>• 1 cup of green beans cooked with 2 teaspoons of olive oil</li> <li>• 1 medium sized baked potato</li> <li>• Fresh salad made with raw or boiled vegetables with 1 teaspoon of olive oil</li> <li>• 1 slice of bread (30g) (preferably whole wheat)</li> </ul> | <b>Lunch</b> <ul style="list-style-type: none"> <li>• 90g fish roasted with 1 teaspoon of olive oil</li> <li>• ½ cup of rice boiled</li> <li>• Fresh salad made with raw or boiled vegetables with 2 teaspoons of olive oil</li> </ul>                                   | <b>Lunch</b> <ul style="list-style-type: none"> <li>• 90g shrimps cooked with homemade tomato sauce and 1 teaspoon of olive oil</li> <li>• 1 cup of pasta cooked (preferably whole wheat)</li> <li>• 1 tablespoon of grated cheese</li> <li>• Fresh salad made with raw or boiled vegetables with 1 teaspoon of olive oil</li> </ul> |
| <b>Afternoon Snack</b> <ul style="list-style-type: none"> <li>• 1 cup of milk (250ml) 1.5% fat or 1 cup (200g) of yogurt 2% fat</li> <li>• 1 medium sized fruit</li> </ul>                                                                                                                                          | <b>Afternoon Snack</b> <ul style="list-style-type: none"> <li>• 1 cup of milk (250ml) 1.5% fat or 1 cup (200g) of yogurt 2% fat</li> <li>• 1 medium sized fruit</li> </ul>                                                                                               | <b>Afternoon Snack</b> <ul style="list-style-type: none"> <li>• 1 cup of milk (250ml) 1.5% fat or 1 cup (200g) of yogurt 2% fat</li> <li>• 1 medium sized fruit</li> </ul>                                                                                                                                                           |
| <b>Dinner</b> <ul style="list-style-type: none"> <li>• 1 chicken souvlaki roasted (100g)</li> <li>• Fresh salad made with raw or boiled vegetables with 2 teaspoons of olive oil</li> <li>• 1 pita bread (60g) without olive oil</li> </ul>                                                                         | <b>Dinner</b><br>Homemade Pizza (ingredients): <ul style="list-style-type: none"> <li>• 1 pita bread (60g)</li> <li>• vegetables (e.g. tomato, peppers, onions, mushrooms)</li> <li>• 30g grated cheese (low fat)</li> <li>• 1 slice of turkey boiled chopped</li> </ul> | <b>Dinner</b> <ul style="list-style-type: none"> <li>• Sandwich with 2 slices of bread (preferably whole wheat), 1 slice of cheese (low fat) and 1 slice of turkey boiled and vegetables (e.g. tomato, lettuce, cucumber)</li> </ul>                                                                                                 |
| <b>Before Bedtime</b> <ul style="list-style-type: none"> <li>• 1 cup of milk (250ml) 1.5% fat or 1 cup (200g) of yogurt 2% fat</li> </ul>                                                                                                                                                                           | <b>Before Bedtime</b> <ul style="list-style-type: none"> <li>• 1 cup of milk (250ml) 1.5% fat or 1 cup (200g) of yogurt 2% fat</li> </ul>                                                                                                                                | <b>Before Bedtime</b> <ul style="list-style-type: none"> <li>• 1 cup of milk (250ml) 1.5% fat or 1 cup (200g) of yogurt 2% fat</li> </ul>                                                                                                                                                                                            |

### Comments

(In the box below please record if you do anything different from what is recommended in your diet meal plan)

[illegible]

## Diet Meal Plan 2

|                                                                                                                                                                                                                                                                                                                                                                                                                                                                                                                                                                                                                                                                                                                                                                                                                                                                                                                                                                                                                                                                                                                                                                                                                                                                                                                                                        |                                                                                                                                                                                                                                                                                                                                                                                                                                                                                                                                                                                                                                                                                                                                                                                                                                                                                                                                                                                                                                                                                                                                                                                                                                                                                                                                                                                                                                                                                  |                                                                                                                                                                                                                                                                                                                                                                                                                                                                                                                                                                                                                                                                                                                                                                                                                                                                                                                                                                                                                                                                                                                                                                                                                                                                                                                                                                                                 |                                                                                                                                                                                                                                                                                                                                                                                                                                                                                                                                                                                                                                                                                                                                                                                                                                                                                                                                                                                                                                                                                                                                                                                                                                                                                                    |
|--------------------------------------------------------------------------------------------------------------------------------------------------------------------------------------------------------------------------------------------------------------------------------------------------------------------------------------------------------------------------------------------------------------------------------------------------------------------------------------------------------------------------------------------------------------------------------------------------------------------------------------------------------------------------------------------------------------------------------------------------------------------------------------------------------------------------------------------------------------------------------------------------------------------------------------------------------------------------------------------------------------------------------------------------------------------------------------------------------------------------------------------------------------------------------------------------------------------------------------------------------------------------------------------------------------------------------------------------------|----------------------------------------------------------------------------------------------------------------------------------------------------------------------------------------------------------------------------------------------------------------------------------------------------------------------------------------------------------------------------------------------------------------------------------------------------------------------------------------------------------------------------------------------------------------------------------------------------------------------------------------------------------------------------------------------------------------------------------------------------------------------------------------------------------------------------------------------------------------------------------------------------------------------------------------------------------------------------------------------------------------------------------------------------------------------------------------------------------------------------------------------------------------------------------------------------------------------------------------------------------------------------------------------------------------------------------------------------------------------------------------------------------------------------------------------------------------------------------|-------------------------------------------------------------------------------------------------------------------------------------------------------------------------------------------------------------------------------------------------------------------------------------------------------------------------------------------------------------------------------------------------------------------------------------------------------------------------------------------------------------------------------------------------------------------------------------------------------------------------------------------------------------------------------------------------------------------------------------------------------------------------------------------------------------------------------------------------------------------------------------------------------------------------------------------------------------------------------------------------------------------------------------------------------------------------------------------------------------------------------------------------------------------------------------------------------------------------------------------------------------------------------------------------------------------------------------------------------------------------------------------------|----------------------------------------------------------------------------------------------------------------------------------------------------------------------------------------------------------------------------------------------------------------------------------------------------------------------------------------------------------------------------------------------------------------------------------------------------------------------------------------------------------------------------------------------------------------------------------------------------------------------------------------------------------------------------------------------------------------------------------------------------------------------------------------------------------------------------------------------------------------------------------------------------------------------------------------------------------------------------------------------------------------------------------------------------------------------------------------------------------------------------------------------------------------------------------------------------------------------------------------------------------------------------------------------------|
| <b>Day 1<sup>st</sup></b><br><b>Breakfast</b> <ul style="list-style-type: none"> <li>1 cup of milk (250ml) 1.5% fat or 1 cup (200g) of yogurt 2% fat</li> <li>½ cup of cereals (whole wheat)</li> </ul> <b>Morning Snack (school)</b> <ul style="list-style-type: none"> <li>Sandwich with 2 slices of bread (whole wheat) and 1 slice of cheese (low fat) and vegetables (e.g. tomato, lettuce, cucumber) (1<sup>st</sup> break)</li> <li>1 medium sized fruit (2<sup>nd</sup> or 3<sup>rd</sup> break)</li> </ul> <b>Lunch</b> <ul style="list-style-type: none"> <li>90g salmon roasted</li> <li>1/3 cup rice boiled (preferably brown) cooked with 1 teaspoon of olive oil</li> <li>Fresh salad made with raw or boiled vegetables with 2 teaspoons olive oil</li> </ul> <b>Afternoon Snack</b> <ul style="list-style-type: none"> <li>1 cup of milk (250ml) 1.5% fat or 1 cup (200g) of yogurt 2% fat</li> <li>1 medium sized fruit</li> </ul> <b>Dinner</b><br>Greek Dakos Salad (ingredients): <ul style="list-style-type: none"> <li>1 medium sized rusk (60g)</li> <li>30g cheese (low fat)</li> <li>grated or chopped tomato</li> <li>2 teaspoons olive oil</li> <li>1 medium sized fruit</li> </ul> <b>Before Bedtime</b> <ul style="list-style-type: none"> <li>1 cup of milk (250ml) 1.5% fat or 1 cup (200g) of yogurt 2% fat</li> </ul> | <b>Day 2<sup>nd</sup></b><br><b>Breakfast</b> <ul style="list-style-type: none"> <li>1 cup of milk (250ml) 1.5% fat or 1 cup (200g) of yogurt 2% fat</li> <li>2 rusks (whole wheat) with 1 teaspoon of jam</li> </ul> <b>Morning Snack (school)</b> <ul style="list-style-type: none"> <li>Sandwich with 2 slices of bread (toasted) (whole wheat) and 1 slice of cheese (low fat) and vegetables (e.g. tomato, lettuce, cucumber) (1<sup>st</sup> break)</li> <li>1 medium sized fruit (2<sup>nd</sup> or 3<sup>rd</sup> break)</li> </ul> <b>Lunch</b> <ul style="list-style-type: none"> <li>1 cup pasta cooked with 1 teaspoon of olive oil</li> <li>60g grated cheese (preferably low fat)</li> <li>Fresh salad made with raw or boiled vegetables with 1 teaspoon olive oil</li> </ul> <b>Afternoon Snack</b> <ul style="list-style-type: none"> <li>1 cup of milk (250ml) 1.5% fat or 1 cup (200g) of yogurt 2% fat</li> <li>1 medium sized fruit</li> </ul> <b>Dinner</b> <ul style="list-style-type: none"> <li>Caesar's Salad (ingredients): <ul style="list-style-type: none"> <li>lettuce</li> <li>30g grated cheese (low fat)</li> <li>1 egg boiled</li> <li>30g turkey boiled and chopped</li> <li>½ cup. croutons whole wheat</li> <li>2 teaspoons of olive oil or 2 teaspoons of mayonnaise light</li> </ul> </li> </ul> <b>Before Bedtime</b> <ul style="list-style-type: none"> <li>1 cup of milk (250ml) 1.5% fat or 1 cup (200g) of yogurt 2% fat</li> </ul> | <b>Day 3<sup>rd</sup></b><br><b>Breakfast</b> <ul style="list-style-type: none"> <li>1 cup of milk (250ml) 1.5% fat or 1 cup (200g) of yogurt 2% fat</li> <li>2 rusks (whole wheat) with 2 teaspoons tahini</li> </ul> <b>Morning Snack (school)</b> <ul style="list-style-type: none"> <li>1 round sesame bread (60g) (1<sup>st</sup> break)</li> <li>1 medium sized fruit (2<sup>nd</sup> or 3<sup>rd</sup> break)</li> </ul> <b>Lunch</b><br>Omelet (ingredients): <ul style="list-style-type: none"> <li>2 eggs white and 1 egg yolk</li> <li>vegetables (e.g. mushrooms, peppers, tomato)</li> <li>30g grated cheese (low fat)</li> <li>2 teaspoons of olive oil</li> <li>1 slice of bread (30g) (whole wheat)</li> <li>Fresh salad made with raw or boiled vegetables with 1 teaspoon olive oil</li> </ul> <b>Afternoon Snack</b> <ul style="list-style-type: none"> <li>1 cup of milk (250ml) 1.5% fat or 1 cup (200g) of yogurt 2% fat</li> <li>½ cup of cereals (whole wheat)</li> </ul> <b>Dinner</b> <ul style="list-style-type: none"> <li>Sandwich with 2 slices of bread (whole wheat) and 1 slice of cheese (low fat), 1 slice of turkey boiled and vegetables (e.g. tomato, lettuce, cucumber)</li> <li>1 medium sized fruit</li> </ul> <b>Before Bedtime</b> <ul style="list-style-type: none"> <li>1 cup of milk (250ml) 1.5% fat or 1 cup (200g) of yogurt 2% fat</li> </ul> | <b>Day 4<sup>th</sup></b><br><b>Breakfast</b> <ul style="list-style-type: none"> <li>1 cup of milk (250ml) 1.5% fat or 1 cup (200g) of yogurt 2% fat</li> <li>½ cup of cereals (whole wheat)</li> </ul> <b>Morning Snack (school)</b> <ul style="list-style-type: none"> <li>1 round sesame bread (60g) (1<sup>st</sup> break)</li> <li>1 medium sized fruit (2<sup>nd</sup> or 3<sup>rd</sup> break)</li> </ul> <b>Lunch</b> <ul style="list-style-type: none"> <li>1 cup of chickpeas cooked with 2 teaspoons of olive oil</li> <li>30g cheese (low fat)</li> <li>Fresh salad made with raw or boiled vegetables with 1 teaspoon olive oil</li> <li>1 medium sized fruit</li> </ul> <b>Afternoon Snack</b> <ul style="list-style-type: none"> <li>1 cup of milk (250ml) 1.5% fat or 1 cup (200g) of yogurt 2% fat</li> <li>1 medium sized fruit</li> </ul> <b>Dinner</b><br>Chef's salad: <ul style="list-style-type: none"> <li>1 egg boiled</li> <li>30g grated cheese (low fat)</li> <li>30g turkey boiled chopped</li> <li>plenty of vegetables</li> <li>½ cup of croutons</li> <li>2 teaspoons of olive oil or 4 teaspoons of mayonnaise</li> </ul> <b>Before Bedtime</b> <ul style="list-style-type: none"> <li>1 cup of milk (250ml) 1.5% fat or 1 cup (200g) of yogurt 2% fat</li> </ul> |
|--------------------------------------------------------------------------------------------------------------------------------------------------------------------------------------------------------------------------------------------------------------------------------------------------------------------------------------------------------------------------------------------------------------------------------------------------------------------------------------------------------------------------------------------------------------------------------------------------------------------------------------------------------------------------------------------------------------------------------------------------------------------------------------------------------------------------------------------------------------------------------------------------------------------------------------------------------------------------------------------------------------------------------------------------------------------------------------------------------------------------------------------------------------------------------------------------------------------------------------------------------------------------------------------------------------------------------------------------------|----------------------------------------------------------------------------------------------------------------------------------------------------------------------------------------------------------------------------------------------------------------------------------------------------------------------------------------------------------------------------------------------------------------------------------------------------------------------------------------------------------------------------------------------------------------------------------------------------------------------------------------------------------------------------------------------------------------------------------------------------------------------------------------------------------------------------------------------------------------------------------------------------------------------------------------------------------------------------------------------------------------------------------------------------------------------------------------------------------------------------------------------------------------------------------------------------------------------------------------------------------------------------------------------------------------------------------------------------------------------------------------------------------------------------------------------------------------------------------|-------------------------------------------------------------------------------------------------------------------------------------------------------------------------------------------------------------------------------------------------------------------------------------------------------------------------------------------------------------------------------------------------------------------------------------------------------------------------------------------------------------------------------------------------------------------------------------------------------------------------------------------------------------------------------------------------------------------------------------------------------------------------------------------------------------------------------------------------------------------------------------------------------------------------------------------------------------------------------------------------------------------------------------------------------------------------------------------------------------------------------------------------------------------------------------------------------------------------------------------------------------------------------------------------------------------------------------------------------------------------------------------------|----------------------------------------------------------------------------------------------------------------------------------------------------------------------------------------------------------------------------------------------------------------------------------------------------------------------------------------------------------------------------------------------------------------------------------------------------------------------------------------------------------------------------------------------------------------------------------------------------------------------------------------------------------------------------------------------------------------------------------------------------------------------------------------------------------------------------------------------------------------------------------------------------------------------------------------------------------------------------------------------------------------------------------------------------------------------------------------------------------------------------------------------------------------------------------------------------------------------------------------------------------------------------------------------------|

## ***Diet Meal Plan 2***

| <b>Day 5<sup>th</sup></b>                                                                                                                                                                                                                                                                                   | <b>Day 6<sup>th</sup> Weekend</b>                                                                                                                                                                                                                                           | <b>Day 7<sup>th</sup> Weekend</b>                                                                                                                                                                                                                                              |
|-------------------------------------------------------------------------------------------------------------------------------------------------------------------------------------------------------------------------------------------------------------------------------------------------------------|-----------------------------------------------------------------------------------------------------------------------------------------------------------------------------------------------------------------------------------------------------------------------------|--------------------------------------------------------------------------------------------------------------------------------------------------------------------------------------------------------------------------------------------------------------------------------|
| <b>Breakfast</b> <ul style="list-style-type: none"> <li>1 cup of milk (250ml) 1.5% fat or 1 cup (200g) of yogurt 2% fat</li> <li>½ cup of cereals (whole wheat)</li> </ul>                                                                                                                                  | <b>Breakfast</b> <ul style="list-style-type: none"> <li>1 cup of milk (250ml) 1.5% fat or 1 cup (200g) of yogurt 2% fat</li> <li>½ cup of cereals (whole wheat)</li> </ul>                                                                                                  | <b>Breakfast</b> <ul style="list-style-type: none"> <li>1 cup of milk (250ml) 1.5% fat or 1 cup (200g) of yogurt 2% fat</li> <li>½ cup of cereals (whole wheat)</li> </ul>                                                                                                     |
| <b>Morning Snack (school)</b> <ul style="list-style-type: none"> <li>Sandwich with 2 slices of bread (whole wheat) and 1 slice of cheese (low fat) and vegetables (e.g. tomato, lettuce, cucumber) (1<sup>st</sup> break)</li> <li>1 medium sized fruit (2<sup>nd</sup> or 3<sup>rd</sup> break)</li> </ul> | <b>Morning Snack</b> <ul style="list-style-type: none"> <li>Sandwich with 2 slices of bread (whole wheat) and 4 teaspoons of tahini and 2 teaspoons honey</li> <li>1 medium sized fruit</li> </ul>                                                                          | <b>Morning Snack</b> <ul style="list-style-type: none"> <li>Sandwich with 2 slices of bread (preferably whole wheat) and 4 teaspoons of tahini and 2 teaspoons honey</li> <li>1 medium sized fruit</li> </ul>                                                                  |
| <b>Lunch</b> <ul style="list-style-type: none"> <li>1 cup peas cooked with fresh tomato sauce and 2 teaspoons of olive oil</li> <li>Fresh salad made with raw or boiled vegetables with 1 teaspoon olive oil</li> <li>1 slice of bread (30g) (whole wheat)</li> <li>1 medium sized fruit</li> </ul>         | <b>Lunch</b> <ul style="list-style-type: none"> <li>90g sardine roasted</li> <li>½ cup of rice boiled (preferably brown)</li> <li>Fresh salad made with raw or boiled vegetables with 1 teaspoon olive oil</li> </ul>                                                       | <b>Lunch</b> <ul style="list-style-type: none"> <li>90g chicken's leg cooked with homemade tomato sauce or lemon and 1 teaspoon of olive oil</li> <li>1 medium sized baked potato</li> <li>Fresh salad made with raw or boiled vegetables with 1 teaspoon olive oil</li> </ul> |
| <b>Afternoon Snack</b> <ul style="list-style-type: none"> <li>1 cup of milk (250ml) 1.5% fat or 1 cup (200g) of yogurt 2% fat</li> <li>1 medium sized fruit</li> </ul>                                                                                                                                      | <b>Afternoon Snack</b> <ul style="list-style-type: none"> <li>1 cup of milk (250ml) 1.5% fat or 1 cup (200g) of yogurt 2% fat</li> <li>1 medium sized fruit</li> </ul>                                                                                                      | <b>Afternoon Snack</b> <ul style="list-style-type: none"> <li>1 cup of milk (250ml) 1.5% fat or 1 cup (200g) of yogurt 2% fat</li> <li>1 medium sized fruit</li> </ul>                                                                                                         |
| <b>Dinner</b> <ul style="list-style-type: none"> <li>1 chicken souvlaki roasted (110g)</li> <li>Fresh salad made with raw or boiled vegetables with 1 teaspoon olive oil</li> <li>½ pitta bread whole wheat (30g) without olive oil</li> </ul>                                                              | <b>Dinner</b><br>Homemade Pizza (ingredients): <ul style="list-style-type: none"> <li>1 pita bread whole bread(60g)</li> <li>vegetables (e.g. tomato, peppers, onions, mushrooms)</li> <li>30g grated cheese (low fat)</li> <li>1 slice of turkey boiled chopped</li> </ul> | <b>Dinner</b><br>Homemade Pizza (ingredients): <ul style="list-style-type: none"> <li>1 pita bread whole bread(60g)</li> <li>vegetables (e.g. tomato, peppers, onions, mushrooms)</li> <li>30g grated cheese (low fat)</li> <li>1 slice of turkey boiled chopped</li> </ul>    |
| <b>Before Bedtime</b> <ul style="list-style-type: none"> <li>1 cup of milk (250ml) 1.5% fat or 1 cup (200g) of yogurt 2% fat</li> </ul>                                                                                                                                                                     | <b>Before Bedtime</b> <ul style="list-style-type: none"> <li>1 cup of milk (250ml) 1.5% fat or 1 cup (200g) of yogurt 2% fat</li> </ul>                                                                                                                                     | <b>Before Bedtime</b> <ul style="list-style-type: none"> <li>1 cup of milk (250ml) 1.5% fat or 1 cup (200g) of yogurt 2% fat</li> </ul>                                                                                                                                        |

## Comments

(In the box below please record if you do anything different from what is recommended in your diet meal plan)

[illegible]

### ***Diet Meal Plan 3***

| <b>Day 1<sup>st</sup></b>                                                                                                                                                                                                                                                                       | <b>Day 2<sup>nd</sup></b>                                                                                                                                                                                                                                                                                  | <b>Day 3<sup>rd</sup></b>                                                                                                                                                                                                                     | <b>Day 4<sup>th</sup></b>                                                                                                                                                                                                                                      |
|-------------------------------------------------------------------------------------------------------------------------------------------------------------------------------------------------------------------------------------------------------------------------------------------------|------------------------------------------------------------------------------------------------------------------------------------------------------------------------------------------------------------------------------------------------------------------------------------------------------------|-----------------------------------------------------------------------------------------------------------------------------------------------------------------------------------------------------------------------------------------------|----------------------------------------------------------------------------------------------------------------------------------------------------------------------------------------------------------------------------------------------------------------|
| <b>Breakfast</b> <ul style="list-style-type: none"> <li>1 cup of milk (250ml) 1.5% fat or 1 cup (200g) of yogurt 2% fat</li> <li>½ cup of cereals (whole wheat)</li> </ul>                                                                                                                      | <b>Breakfast</b> <ul style="list-style-type: none"> <li>1 cup of milk (250ml) 1.5% fat or 1 cup (200g) of yogurt 2% fat</li> <li>½ cup of cereals (whole wheat)</li> </ul>                                                                                                                                 | <b>Breakfast</b> <ul style="list-style-type: none"> <li>1 cup of milk (250ml) 1.5% fat or 1 cup (200g) of yogurt 2% fat</li> <li>2 rusks (whole wheat) with 2 teaspoons of tahini</li> </ul>                                                  | <b>Breakfast</b> <ul style="list-style-type: none"> <li>1 cup of milk (250ml) 1.5% fat or 1 cup (200g) of yogurt 2% fat</li> <li>½ cup of cereals (whole wheat)</li> </ul>                                                                                     |
| <b>Morning Snack (school)</b> <ul style="list-style-type: none"> <li>Sandwich with 2 slices of bread (whole wheat), 30g cottage cheese and vegetables (e.g. tomato, lettuce, cucumber) (1<sup>st</sup> break)</li> <li>1 medium sized fruit (2<sup>nd</sup> or 3<sup>rd</sup> break)</li> </ul> | <b>Morning Snack (school)</b> <ul style="list-style-type: none"> <li>Sandwich with 2 slices of bread (whole wheat), 30g cottage cheese and vegetables (e.g. tomato, lettuce, cucumber) (1<sup>st</sup> break)</li> <li>1 medium sized fruit (2<sup>nd</sup> or 3<sup>rd</sup> break)</li> </ul>            | <b>Morning Snack (school)</b> <ul style="list-style-type: none"> <li>1 round sesame bread (1<sup>st</sup> break)</li> <li>1 medium sized fruit (2<sup>nd</sup> or 3<sup>rd</sup> break)</li> </ul>                                            | <b>Morning Snack (school)</b> <ul style="list-style-type: none"> <li>1 round sesame bread (1<sup>st</sup> break)</li> <li>1 medium sized fruit (2<sup>nd</sup> or 3<sup>rd</sup> break)</li> </ul>                                                             |
| <b>Lunch</b> <ul style="list-style-type: none"> <li>90g roasted chicken's breast cooked with tomato sauce and herbs</li> <li>3/4 cup rice boiled cooked with 1 teaspoon of olive oil</li> <li>Fresh salad made with raw or boiled vegetables with 2 teaspoons of olive oil</li> </ul>           | <b>Lunch</b> <ul style="list-style-type: none"> <li>1 cup pasta (whole wheat) cooked with 1 teaspoon of olive oil</li> <li>30g grated cheese (low fat)</li> <li>Fresh salad made with raw or boiled vegetables with 2 teaspoons of olive oil</li> </ul>                                                    | <b>Lunch</b> <ul style="list-style-type: none"> <li>90g roasted fish cooked with 1 teaspoon of olive oil</li> <li>1 medium sized baked potato</li> <li>Fresh salad made with raw or boiled vegetables with 1 teaspoon of olive oil</li> </ul> | <b>Lunch</b> <ul style="list-style-type: none"> <li>1 cup of lentils cooked with 2 teaspoons of olive oil</li> <li>Fresh salad made with raw or boiled vegetables with 1 teaspoon of olive oil</li> <li>1 slice of whole wheat bread</li> </ul>                |
| <b>Afternoon Snack</b> <ul style="list-style-type: none"> <li>1 cup of milk (250ml) 1.5% fat or 1 cup (200g) of yogurt 2% fat</li> <li>1 medium sized fruit</li> </ul>                                                                                                                          | <b>Afternoon Snack</b> <ul style="list-style-type: none"> <li>1 cup of milk (250ml) 1.5% fat or 1 cup (200g) of yogurt 2% fat</li> <li>1 medium sized fruit</li> </ul>                                                                                                                                     | <b>Afternoon Snack</b> <ul style="list-style-type: none"> <li>1 cup of milk (250ml) 1.5% fat or 1 cup (200g) of yogurt 2% fat</li> <li>½ cup of cereals (whole wheat)</li> </ul>                                                              | <b>Afternoon Snack</b> <ul style="list-style-type: none"> <li>1 cup of milk (250ml) 1.5% fat or 1 cup (200g) of yogurt 2% fat</li> <li>1 medium sized fruit</li> </ul>                                                                                         |
| <b>Dinner</b><br>Greek Dakos salad (ingredients): <ul style="list-style-type: none"> <li>1 medium sized rusk whole wheat (60g)</li> <li>30g cottage cheese</li> <li>grated or chopped tomato</li> <li>2 teaspoons of olive oil</li> <li>1 medium sized fruit</li> </ul>                         | <b>Dinner</b> <ul style="list-style-type: none"> <li>Caesar's Salad (ingredients):               <ul style="list-style-type: none"> <li>lettuce</li> <li>30g cottage cheese</li> <li>30g roasted chicken's breast chopped</li> <li>2 grated rusks</li> <li>2 teaspoons of olive oil</li> </ul> </li> </ul> | <b>Dinner</b> <ul style="list-style-type: none"> <li>Sandwich with 2 slices of bread (whole wheat) and 30g cottage cheese and vegetables (e.g. tomato, lettuce, cucumber)</li> <li>1 medium sized fruit</li> </ul>                            | <b>Dinner</b><br>Chef's salad: <ul style="list-style-type: none"> <li>1 egg boiled</li> <li>30g cottage cheese</li> <li>30g turkey boiled chopped</li> <li>plenty of vegetables</li> <li>2 grated rusks</li> <li>2 teaspoons of olive oil</li> <li></li> </ul> |
| <b>Before Bedtime</b> <ul style="list-style-type: none"> <li>1 cup of milk (250ml) 1.5% fat or 1 cup (200g) of yogurt 2% fat</li> </ul>                                                                                                                                                         | <b>Before Bedtime</b> <ul style="list-style-type: none"> <li>1 cup of milk (250ml) 1.5% fat or 1 cup (200g) of yogurt 2% fat</li> </ul>                                                                                                                                                                    | <b>Before Bedtime</b> <ul style="list-style-type: none"> <li>1 cup of milk (250ml) 1.5% fat or 1 cup (200g) of yogurt 2% fat</li> </ul>                                                                                                       | <b>Before Bedtime</b> <ul style="list-style-type: none"> <li>1 cup of milk (250ml) 1.5% fat or 1 cup (200g) of yogurt 2% fat</li> </ul>                                                                                                                        |

### ***Diet Meal Plan 3***

| <b>Day 5<sup>th</sup></b>                                                                                                                                                                                                                                                                                    | <b>Day 6<sup>th</sup> Weekend</b>                                                                                                                                                                                                                                  | <b>Day 7<sup>th</sup> Weekend</b>                                                                                                                                                                                                                                       |
|--------------------------------------------------------------------------------------------------------------------------------------------------------------------------------------------------------------------------------------------------------------------------------------------------------------|--------------------------------------------------------------------------------------------------------------------------------------------------------------------------------------------------------------------------------------------------------------------|-------------------------------------------------------------------------------------------------------------------------------------------------------------------------------------------------------------------------------------------------------------------------|
| <b>Breakfast</b> <ul style="list-style-type: none"> <li>1 cup of milk (250ml) 1.5% fat or 1 cup (200g) of yogurt 2% fat</li> <li>½ cup of cereals (whole wheat)</li> </ul>                                                                                                                                   | <b>Breakfast</b> <ul style="list-style-type: none"> <li>1 cup of milk (250ml) 1.5% fat or 1 cup (200g) of yogurt 2% fat</li> <li>½ cup of cereals (whole wheat)</li> </ul>                                                                                         | <b>Breakfast</b> <ul style="list-style-type: none"> <li>1 cup of milk (250ml) 1.5% fat or 1 cup (200g) of yogurt 2% fat</li> <li>½ cup of cereals (whole wheat)</li> </ul>                                                                                              |
| <b>Morning Snack( school)</b> <ul style="list-style-type: none"> <li>Sandwich with 2 slices of bread (whole wheat) and 30g cottage cheese (low fat) and vegetables (e.g. tomato, lettuce, cucumber) (1<sup>st</sup> break)</li> <li>1 medium sized fruit (2<sup>nd</sup> or 3<sup>rd</sup> break)</li> </ul> | <b>Morning Snack</b> <ul style="list-style-type: none"> <li>Sandwich with 2 slices of bread (whole wheat) and 4 teaspoons of tahini</li> <li>1 medium sized fruit</li> </ul>                                                                                       | <b>Morning Snack</b> <ul style="list-style-type: none"> <li>Sandwich with 2 slices of bread (whole wheat) and 4 teaspoons of tahini</li> <li>1 medium sized fruit</li> </ul>                                                                                            |
| <b>Lunch</b> <ul style="list-style-type: none"> <li>1 cup peas cooked with fresh tomato sauce, 1/2 medium sized potato and 2 teaspoons of olive oil</li> <li>Fresh salad made with raw or boiled vegetables with 1 teaspoon olive oil</li> <li>1 medium sized fruit</li> </ul>                               | <b>Lunch</b> <ul style="list-style-type: none"> <li>90g roasted fish cooked with 1 teaspoon of olive oil</li> <li>1/3 cup of rice boiled (brown)</li> <li>Fresh salad made with raw or boiled vegetables with 1 teaspoon olive oil</li> </ul>                      | <b>Lunch</b> <ul style="list-style-type: none"> <li>90g shrimps cooked with homemade tomato sauce and 1 teaspoon of olive oil</li> <li>1 cup of pasta (whole wheat) cooked</li> <li>Fresh salad made with raw or boiled vegetables with 1 teaspoon olive oil</li> </ul> |
| <b>Afternoon Snack</b> <ul style="list-style-type: none"> <li>1 cup of milk (250ml) 1.5% fat or 1 cup (200g) of yogurt 2% fat</li> <li>1 medium sized fruit</li> </ul>                                                                                                                                       | <b>Afternoon Snack</b> <ul style="list-style-type: none"> <li>1 cup of milk (250ml) 1.5% fat or 1 cup (200g) of yogurt 2% fat</li> <li>1 medium sized fruit</li> </ul>                                                                                             | <b>Afternoon Snack</b> <ul style="list-style-type: none"> <li>1 cup of milk (250ml) 1.5% fat or 1 cup (200g) of yogurt 2% fat</li> <li>1 medium sized fruit</li> </ul>                                                                                                  |
| <b>Dinner</b> <ul style="list-style-type: none"> <li>1 chicken souvlaki roasted (100g)</li> <li>Fresh salad made with raw or boiled vegetables with 1 teaspoon of olive oil</li> <li>½ pita bread whole wheat (30g) without olive oil</li> </ul>                                                             | <b>Dinner</b><br>Homemade Pizza (ingredients): <ul style="list-style-type: none"> <li>1 pita bread whole bread(60g)</li> <li>vegetables (e.g. tomato, peppers, onions, mushrooms)</li> <li>30g cottage cheese</li> <li>1 slice of turkey boiled chopped</li> </ul> | <b>Dinner</b><br>Homemade Pizza (ingredients): <ul style="list-style-type: none"> <li>1 pita bread whole bread(60g)</li> <li>vegetables (e.g. tomato, peppers, onions, mushrooms)</li> <li>30g cottage cheese</li> <li>1 slice of turkey boiled chopped</li> </ul>      |
| <b>Before Bedtime</b> <ul style="list-style-type: none"> <li>1 cup of milk (250ml) 1.5% fat or 1 cup (200g) of yogurt 2% fat</li> </ul>                                                                                                                                                                      | <b>Before Bedtime</b> <ul style="list-style-type: none"> <li>1 cup of milk (250ml) 1.5% fat or 1 cup (200g) of yogurt 2% fat</li> </ul>                                                                                                                            | <b>Before Bedtime</b> <ul style="list-style-type: none"> <li>1 cup of milk (250ml) 1.5% fat or 1 cup (200g) of yogurt 2% fat</li> </ul>                                                                                                                                 |



## Comments

(In the box below please record if you do anything different from what is recommended in your diet meal plan)

[illegible]

## Diet Meal Plan 4

|                                                                                                                                                                                                                                                                                                                                                                                                                                                                                                                                                                                                                                                                                                                                                                                                                                                                                                                                                                                                                                                                                                                                                                                                                                                                                                                                                                                                                              |                                                                                                                                                                                                                                                                                                                                                                                                                                                                                                                                                                                                                                                                                                                                                                                                                                                                                                                                                                                                                                                                                                                                                                                                                                                                                                                                                                                                                                                |                                                                                                                                                                                                                                                                                                                                                                                                                                                                                                                                                                                                                                                                                                                                                                                                                                                                                                                                                                                                                                                                                                                                                                                                                                                                                                                                     |                                                                                                                                                                                                                                                                                                                                                                                                                                                                                                                                                                                                                                                                                                                                                                                                                                                                                                                                                                                                                                                                                                                                                                                                                                                                                                                  |
|------------------------------------------------------------------------------------------------------------------------------------------------------------------------------------------------------------------------------------------------------------------------------------------------------------------------------------------------------------------------------------------------------------------------------------------------------------------------------------------------------------------------------------------------------------------------------------------------------------------------------------------------------------------------------------------------------------------------------------------------------------------------------------------------------------------------------------------------------------------------------------------------------------------------------------------------------------------------------------------------------------------------------------------------------------------------------------------------------------------------------------------------------------------------------------------------------------------------------------------------------------------------------------------------------------------------------------------------------------------------------------------------------------------------------|------------------------------------------------------------------------------------------------------------------------------------------------------------------------------------------------------------------------------------------------------------------------------------------------------------------------------------------------------------------------------------------------------------------------------------------------------------------------------------------------------------------------------------------------------------------------------------------------------------------------------------------------------------------------------------------------------------------------------------------------------------------------------------------------------------------------------------------------------------------------------------------------------------------------------------------------------------------------------------------------------------------------------------------------------------------------------------------------------------------------------------------------------------------------------------------------------------------------------------------------------------------------------------------------------------------------------------------------------------------------------------------------------------------------------------------------|-------------------------------------------------------------------------------------------------------------------------------------------------------------------------------------------------------------------------------------------------------------------------------------------------------------------------------------------------------------------------------------------------------------------------------------------------------------------------------------------------------------------------------------------------------------------------------------------------------------------------------------------------------------------------------------------------------------------------------------------------------------------------------------------------------------------------------------------------------------------------------------------------------------------------------------------------------------------------------------------------------------------------------------------------------------------------------------------------------------------------------------------------------------------------------------------------------------------------------------------------------------------------------------------------------------------------------------|------------------------------------------------------------------------------------------------------------------------------------------------------------------------------------------------------------------------------------------------------------------------------------------------------------------------------------------------------------------------------------------------------------------------------------------------------------------------------------------------------------------------------------------------------------------------------------------------------------------------------------------------------------------------------------------------------------------------------------------------------------------------------------------------------------------------------------------------------------------------------------------------------------------------------------------------------------------------------------------------------------------------------------------------------------------------------------------------------------------------------------------------------------------------------------------------------------------------------------------------------------------------------------------------------------------|
| <b>Day 1<sup>st</sup></b><br><b>Breakfast</b> <ul style="list-style-type: none"> <li>1 cup of milk (250ml) 1.5% fat or 1 cup (200g) of yogurt 2% fat</li> <li>½ cup of cereals (whole wheat)</li> </ul> <b>Morning Snack (school)</b> <ul style="list-style-type: none"> <li>Sandwich with 2 slices of bread (whole wheat) and 30g cottage cheese and vegetables (e.g. tomato, lettuce, cucumber) (1<sup>st</sup> break)</li> <li>1 medium sized fruit (ideally unpeeled) (2<sup>nd</sup> or 3<sup>rd</sup> break)</li> </ul> <b>Lunch</b> <ul style="list-style-type: none"> <li>90g roasted chicken's breast without skin, cooked with tomato sauce and herbs</li> <li>½ cup of brown rice boiled</li> <li>Fresh salad made with raw or boiled vegetables, with 2 teaspoons of olive oil</li> </ul> <b>Afternoon Snack</b> <ul style="list-style-type: none"> <li>1 cup of milk (250ml) 1.5% fat or 1 cup (200g) of yogurt 2% fat</li> <li>1 medium sized fruit (ideally unpeeled)</li> </ul> <b>Dinner</b><br>Greek Dakos salad (ingredients): <ul style="list-style-type: none"> <li>1 medium rusk whole wheat (60g)</li> <li>30g cottage cheese</li> <li>grated or chopped tomato</li> <li>2 teaspoons of olive oil</li> <li>1 medium sized fruit (ideally unpeeled)</li> </ul> <b>Before Bedtime</b> <ul style="list-style-type: none"> <li>1 cup of milk (250ml) 1.5% fat or 1 cup (200g) of yogurt 2% fat</li> </ul> | <b>Day 2<sup>nd</sup></b><br><b>Breakfast</b> <ul style="list-style-type: none"> <li>1 cup of milk (250ml) 1.5% fat or 1 cup (200g) of yogurt 2% fat</li> <li>½ cup of cereals (whole wheat)</li> </ul> <b>Morning Snack (school)</b> <ul style="list-style-type: none"> <li>Sandwich with 2 slices of bread (whole wheat) and 30g cottage cheese and vegetables (e.g. tomato, lettuce, cucumber) (1<sup>st</sup> break)</li> <li>1 medium sized fruit (ideally unpeeled) (2<sup>nd</sup> or 3<sup>rd</sup> break)</li> </ul> <b>Lunch</b> <ul style="list-style-type: none"> <li>1 cup of pasta (whole wheat) cooked with 1 teaspoon of olive oil</li> <li>30g grated cheese (low fat)</li> <li>Fresh salad made with raw or boiled vegetables with 2 teaspoons of olive oil</li> </ul> <b>Afternoon Snack</b> <ul style="list-style-type: none"> <li>1 cup of milk (250ml) 1.5% fat or 1 cup (200g) of yogurt 2% fat</li> <li>1 medium sized fruit (ideally unpeeled)</li> </ul> <b>Dinner</b><br>Caesar's Salad (ingredients): <ul style="list-style-type: none"> <li>lettuce</li> <li>30g cottage cheese</li> <li>30g roasted chicken's breast without skin chopped</li> <li>2 grated rusks unsalted</li> <li>2 teaspoons of olive oil</li> <li>1 medium sized fruit (ideally unpeeled)</li> </ul> <b>Before Bedtime</b> <ul style="list-style-type: none"> <li>1 cup of milk (250ml) 1.5% fat or 1 cup (200g) of yogurt 2% fat</li> </ul> | <b>Day 3<sup>rd</sup></b><br><b>Breakfast</b> <ul style="list-style-type: none"> <li>1 cup of milk (250ml) 1.5% fat or 1 cup (200g) of yogurt 2% fat</li> <li>2 rusks unsalted (whole wheat) with 2 teaspoons of tahini</li> </ul> <b>Morning Snack (school)</b> <ul style="list-style-type: none"> <li>1 round sesame bread whole wheat (1<sup>st</sup> break)</li> <li>1 medium sized fruit (ideally unpeeled) (2<sup>nd</sup> or 3<sup>rd</sup> break)</li> </ul> <b>Lunch</b> <ul style="list-style-type: none"> <li>90g roasted chicken's breast without skin cooked with lemon and 1 teaspoon of olive oil</li> <li>1 medium sized baked potato with its skin</li> <li>Fresh salad made with raw or boiled vegetables with 2 teaspoons of olive oil</li> </ul> <b>Afternoon Snack</b> <ul style="list-style-type: none"> <li>1 cup of milk (250ml) 1.5% fat or 1 cup (200g) of yogurt 2% fat</li> <li>½ cup of cereals (whole wheat)</li> </ul> <b>Dinner</b> <ul style="list-style-type: none"> <li>Sandwich with 2 slices of bread (whole wheat) and 60g cottage cheese and vegetables (e.g. tomato, lettuce, cucumber)</li> <li>1 medium sized fruit (ideally unpeeled)</li> </ul> <b>Before Bedtime</b> <ul style="list-style-type: none"> <li>1 cup of milk (250ml) 1.5% fat or 1 cup (200g) of yogurt 2% fat</li> </ul> | <b>Day 4<sup>th</sup></b><br><b>Breakfast</b> <ul style="list-style-type: none"> <li>1 cup of milk (250ml) 1.5% fat or 1 cup (200g) of yogurt 2% fat</li> <li>½ cup of cereals (whole wheat)</li> </ul> <b>Morning Snack (school)</b> <ul style="list-style-type: none"> <li>1 round sesame bread whole wheat (1<sup>st</sup> break)</li> <li>1 medium sized fruit (ideally unpeeled) (2<sup>nd</sup> or 3<sup>rd</sup> break)</li> </ul> <b>Lunch</b> <ul style="list-style-type: none"> <li>1 cup of lentils cooked with 2 teaspoons of olive oil</li> <li>Fresh salad made with raw or boiled vegetables with 1 teaspoon of olive oil</li> <li>1 slice of whole wheat bread (30g)</li> </ul> <b>Afternoon Snack</b> <ul style="list-style-type: none"> <li>1 cup of milk (250ml) 1.5% fat or 1 cup (200g) of yogurt 2% fat</li> <li>1 medium sized fruit (ideally unpeeled)</li> </ul> <b>Dinner</b><br>Caesar's Salad (ingredients): <ul style="list-style-type: none"> <li>30g cottage cheese</li> <li>30g roasted chicken's breast without skin chopped</li> <li>2 grated rusks unsalted</li> <li>1 teaspoon of olive oil</li> <li>plenty of vegetables</li> </ul> <b>Before Bedtime</b> <ul style="list-style-type: none"> <li>1 cup of milk (250ml) 1.5% fat or 1 cup (200g) of yogurt 2% fat</li> </ul> |
|------------------------------------------------------------------------------------------------------------------------------------------------------------------------------------------------------------------------------------------------------------------------------------------------------------------------------------------------------------------------------------------------------------------------------------------------------------------------------------------------------------------------------------------------------------------------------------------------------------------------------------------------------------------------------------------------------------------------------------------------------------------------------------------------------------------------------------------------------------------------------------------------------------------------------------------------------------------------------------------------------------------------------------------------------------------------------------------------------------------------------------------------------------------------------------------------------------------------------------------------------------------------------------------------------------------------------------------------------------------------------------------------------------------------------|------------------------------------------------------------------------------------------------------------------------------------------------------------------------------------------------------------------------------------------------------------------------------------------------------------------------------------------------------------------------------------------------------------------------------------------------------------------------------------------------------------------------------------------------------------------------------------------------------------------------------------------------------------------------------------------------------------------------------------------------------------------------------------------------------------------------------------------------------------------------------------------------------------------------------------------------------------------------------------------------------------------------------------------------------------------------------------------------------------------------------------------------------------------------------------------------------------------------------------------------------------------------------------------------------------------------------------------------------------------------------------------------------------------------------------------------|-------------------------------------------------------------------------------------------------------------------------------------------------------------------------------------------------------------------------------------------------------------------------------------------------------------------------------------------------------------------------------------------------------------------------------------------------------------------------------------------------------------------------------------------------------------------------------------------------------------------------------------------------------------------------------------------------------------------------------------------------------------------------------------------------------------------------------------------------------------------------------------------------------------------------------------------------------------------------------------------------------------------------------------------------------------------------------------------------------------------------------------------------------------------------------------------------------------------------------------------------------------------------------------------------------------------------------------|------------------------------------------------------------------------------------------------------------------------------------------------------------------------------------------------------------------------------------------------------------------------------------------------------------------------------------------------------------------------------------------------------------------------------------------------------------------------------------------------------------------------------------------------------------------------------------------------------------------------------------------------------------------------------------------------------------------------------------------------------------------------------------------------------------------------------------------------------------------------------------------------------------------------------------------------------------------------------------------------------------------------------------------------------------------------------------------------------------------------------------------------------------------------------------------------------------------------------------------------------------------------------------------------------------------|

## ***Diet Meal Plan 4***

|                                                                                                                                                                                                                                                                                                                                                                                                                                                                                                                                                                                                                                                                                                                                                                                                                                                                                                                                                                                                                                                                                                                                                                                                                                                                                                                                                                                                                                                                                                      |                                                                                                                                                                                                                                                                                                                                                                                                                                                                                                                                                                                                                                                                                                                                                                                                                                                                                                                                                                                                                                                                                                                                                                                                                                                                             |                                                                                                                                                                                                                                                                                                                                                                                                                                                                                                                                                                                                                                                                                                                                                                                                                                                                                                                                                                                                                                                                                                                                                                                                                                                                                                                                                               |
|------------------------------------------------------------------------------------------------------------------------------------------------------------------------------------------------------------------------------------------------------------------------------------------------------------------------------------------------------------------------------------------------------------------------------------------------------------------------------------------------------------------------------------------------------------------------------------------------------------------------------------------------------------------------------------------------------------------------------------------------------------------------------------------------------------------------------------------------------------------------------------------------------------------------------------------------------------------------------------------------------------------------------------------------------------------------------------------------------------------------------------------------------------------------------------------------------------------------------------------------------------------------------------------------------------------------------------------------------------------------------------------------------------------------------------------------------------------------------------------------------|-----------------------------------------------------------------------------------------------------------------------------------------------------------------------------------------------------------------------------------------------------------------------------------------------------------------------------------------------------------------------------------------------------------------------------------------------------------------------------------------------------------------------------------------------------------------------------------------------------------------------------------------------------------------------------------------------------------------------------------------------------------------------------------------------------------------------------------------------------------------------------------------------------------------------------------------------------------------------------------------------------------------------------------------------------------------------------------------------------------------------------------------------------------------------------------------------------------------------------------------------------------------------------|---------------------------------------------------------------------------------------------------------------------------------------------------------------------------------------------------------------------------------------------------------------------------------------------------------------------------------------------------------------------------------------------------------------------------------------------------------------------------------------------------------------------------------------------------------------------------------------------------------------------------------------------------------------------------------------------------------------------------------------------------------------------------------------------------------------------------------------------------------------------------------------------------------------------------------------------------------------------------------------------------------------------------------------------------------------------------------------------------------------------------------------------------------------------------------------------------------------------------------------------------------------------------------------------------------------------------------------------------------------|
| <p><b>Day 5<sup>th</sup></b></p> <p>Breakfast</p> <ul style="list-style-type: none"> <li>• 1 cup of milk (250ml) 1.5% fat or 1 cup (200g) of yogurt 2% fat</li> <li>• ½ cup of cereals (whole wheat)</li> </ul> <p>Morning Snack(school)</p> <ul style="list-style-type: none"> <li>• Sandwich with 2 slices of bread (toasted) (whole wheat) and 30g cottage cheese (low fat) and vegetables (e.g. tomato, lettuce, cucumber) (1<sup>st</sup> break)</li> <li>• 1 medium sized fruit (ideally unpeeled) (2<sup>nd</sup> or 3<sup>rd</sup> break)</li> </ul> <p>Lunch</p> <ul style="list-style-type: none"> <li>• 1 cup of peas cooked with fresh tomato sauce and 2 teaspoons of olive oil</li> <li>• 1 slice of bread whole wheat (30g)</li> <li>• Fresh salad made with raw or boiled vegetables with 2 teaspoons olive oil</li> <li>• 1 medium sized fruit (ideally unpeeled)</li> </ul> <p>Afternoon Snack</p> <ul style="list-style-type: none"> <li>• 1 cup of milk (250ml) 1.5% fat or 1 cup (200g) of yogurt 2% fat</li> <li>• 1 medium sized fruit (ideally unpeeled)</li> </ul> <p>Dinner</p> <ul style="list-style-type: none"> <li>• 1 chicken breast souvlaki roasted (100g)</li> <li>• Fresh salad made with raw or boiled vegetables with 2 teaspoons of olive oil</li> <li>• ½ pita bread whole wheat (30g) without olive oil</li> </ul> <p>Before Bedtime</p> <ul style="list-style-type: none"> <li>• 1 cup of milk (250ml) 1.5% fat or 1 cup (200g) of yogurt 2% fat</li> </ul> | <p><b>Day 6<sup>th</sup> Weekend</b></p> <p>Breakfast</p> <ul style="list-style-type: none"> <li>• 1 cup of milk (250ml) 1.5% fat or 1 cup (200g) of yogurt 2% fat</li> <li>• ½ cup of cereals (whole wheat)</li> </ul> <p>Morning Snack</p> <ul style="list-style-type: none"> <li>• Sandwich with 2 slices of bread (whole wheat and unsalted) and 4 teaspoons of tahini and 1 teaspoon of honey</li> <li>• 1 medium sized fruit (ideally unpeeled)</li> </ul> <p>Lunch</p> <ul style="list-style-type: none"> <li>• 90g roasted fish</li> <li>• 1/3 cup of rice boiled (brown)</li> <li>• Fresh salad made with raw or boiled vegetables with 2 teaspoons of olive oil</li> </ul> <p>Afternoon Snack</p> <ul style="list-style-type: none"> <li>• 1 cup of milk (250ml) 1.5% fat or 1 cup (200g) of yogurt 2% fat</li> <li>• 1 medium sized fruit (ideally unpeeled)</li> </ul> <p>Dinner</p> <p>Greek Dakos salad (ingredients):</p> <ul style="list-style-type: none"> <li>• 1 medium rusk whole wheat (60g)</li> <li>• 30g cottage cheese</li> <li>• grated or chopped tomato</li> <li>• 1 teaspoon of olive oil</li> </ul> <p>Before Bedtime</p> <ul style="list-style-type: none"> <li>• 1 cup of milk (250ml) 1.5% fat or 1 cup (200g) of yogurt 2% fat</li> </ul> | <p><b>Day 7<sup>th</sup> Weekend</b></p> <p>Breakfast</p> <ul style="list-style-type: none"> <li>• 1 cup of milk (250ml) 1.5% fat or 1 cup (200g) of yogurt 2% fat</li> <li>• ½ cup of cereals (whole wheat)</li> </ul> <p>Morning Snack</p> <ul style="list-style-type: none"> <li>• Sandwich with 2 slices of bread (whole wheat) and 3 teaspoons of tahini and 1 teaspoon of honey</li> <li>• 1 medium sized fruit (ideally unpeeled)</li> </ul> <p>Lunch</p> <ul style="list-style-type: none"> <li>• 90g shrimps cooked with homemade tomato sauce and 1 teaspoon of olive oil</li> <li>• 1 cup of pasta (whole wheat) cooked</li> <li>• 1 tablespoon of grated cheese</li> <li>• Fresh salad made with raw or boiled vegetables with 2 teaspoons of olive oil</li> </ul> <p>Afternoon Snack</p> <ul style="list-style-type: none"> <li>• 1 cup of milk (250ml) 1.5% fat or 1 cup (200g) of yogurt 2% fat</li> <li>• 1 medium sized fruit (ideally unpeeled)</li> </ul> <p>Dinner</p> <ul style="list-style-type: none"> <li>• Sandwich with 2 slices of bread (whole wheat), 60g cottage cheese and vegetables (e.g. tomato, lettuce, cucumber)</li> <li>• 1 medium sized fruit (ideally unpeeled)</li> </ul> <p>Before Bedtime</p> <ul style="list-style-type: none"> <li>• 1 cup of milk (250ml) 1.5% fat or 1 cup (200g) of yogurt 2% fat</li> </ul> |
|------------------------------------------------------------------------------------------------------------------------------------------------------------------------------------------------------------------------------------------------------------------------------------------------------------------------------------------------------------------------------------------------------------------------------------------------------------------------------------------------------------------------------------------------------------------------------------------------------------------------------------------------------------------------------------------------------------------------------------------------------------------------------------------------------------------------------------------------------------------------------------------------------------------------------------------------------------------------------------------------------------------------------------------------------------------------------------------------------------------------------------------------------------------------------------------------------------------------------------------------------------------------------------------------------------------------------------------------------------------------------------------------------------------------------------------------------------------------------------------------------|-----------------------------------------------------------------------------------------------------------------------------------------------------------------------------------------------------------------------------------------------------------------------------------------------------------------------------------------------------------------------------------------------------------------------------------------------------------------------------------------------------------------------------------------------------------------------------------------------------------------------------------------------------------------------------------------------------------------------------------------------------------------------------------------------------------------------------------------------------------------------------------------------------------------------------------------------------------------------------------------------------------------------------------------------------------------------------------------------------------------------------------------------------------------------------------------------------------------------------------------------------------------------------|---------------------------------------------------------------------------------------------------------------------------------------------------------------------------------------------------------------------------------------------------------------------------------------------------------------------------------------------------------------------------------------------------------------------------------------------------------------------------------------------------------------------------------------------------------------------------------------------------------------------------------------------------------------------------------------------------------------------------------------------------------------------------------------------------------------------------------------------------------------------------------------------------------------------------------------------------------------------------------------------------------------------------------------------------------------------------------------------------------------------------------------------------------------------------------------------------------------------------------------------------------------------------------------------------------------------------------------------------------------|

### Comments

(In the box below please record if you do anything different from what is recommended in your diet meal plan)

[illegible]
