# Supplementary material for: Assessment of the Effectiveness of a Computerised Decision-Support Tool for Health Professionals for the Prevention and Treatment of Childhood Obesity. Results from a Randomised Controlled Trial
Source: MDPI journal article supplement (doi:10.3390/nu11030706), 2019-03-26
Supplement: s1 [file s1]

## Evaluation of children's weight status

### Step 1

$$\text{Body Weight (Kg)} / \text{Height}^2 (\text{m}^2) = \text{BMI (Kg/m}^2\text{)}$$

*Evaluation of child's weight status based on the appropriate BMI-for-age growth curve*

Normal-weight (BMI <85<sup>th</sup> percentile)

*Continue with the decision tree algorithm  
for normal-weight children*

Overweight (BMI ≥85<sup>th</sup> to < 95<sup>th</sup> percentile)

*Continue with the decision tree algorithm  
for overweight children*

Obese (BMI ≥ 95<sup>th</sup> percentile)

*Continue with the decision tree algorithm  
for obese children*

## Decision tree algorithm for normal-weight children

### Step 2 (Continue from Step 1 for normal-weight children)

*Evaluation of the likelihood for the future manifestation of obesity based on the CORE-index score*

Lower likelihood (CORE index score < 4)

*Provide general age-specific recommendations  
for healthy growth and nourishment*

***Recommendation 1***

Higher likelihood (CORE index score  $\geq 4$ )

*Continue with the decision tree algorithm for normal-weight children with a higher likelihood for the future manifestation of obesity*

## Decision tree algorithm for normal-weight children with a higher likelihood for the future manifestation of obesity

### Step 3 (Continue from Step 2)

*Normal-weight children with a higher likelihood for the future manifestation of obesity*

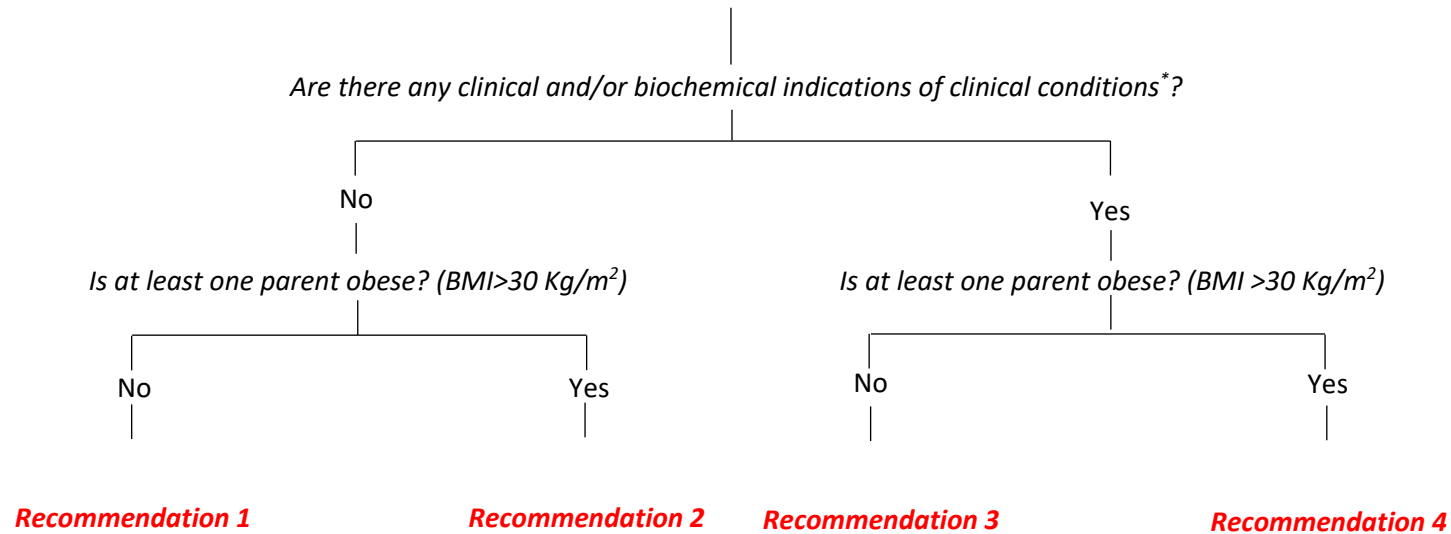

\*Clinical conditions include metabolic disorders, such as hyperglycaemia, insulin resistance, dyslipidaemias, hypertension based on indications stemming from the clinical examination of the child (e.g. increased blood pressure levels etc.) and on the elevated levels of biochemical indices available to the health professionals or to the family.

## Step 4 (Continue from Step 1 for overweight children)

**Overweight children (BMI  $\geq 85^{\text{th}}$  to  $< 95^{\text{th}}$  percentile)**

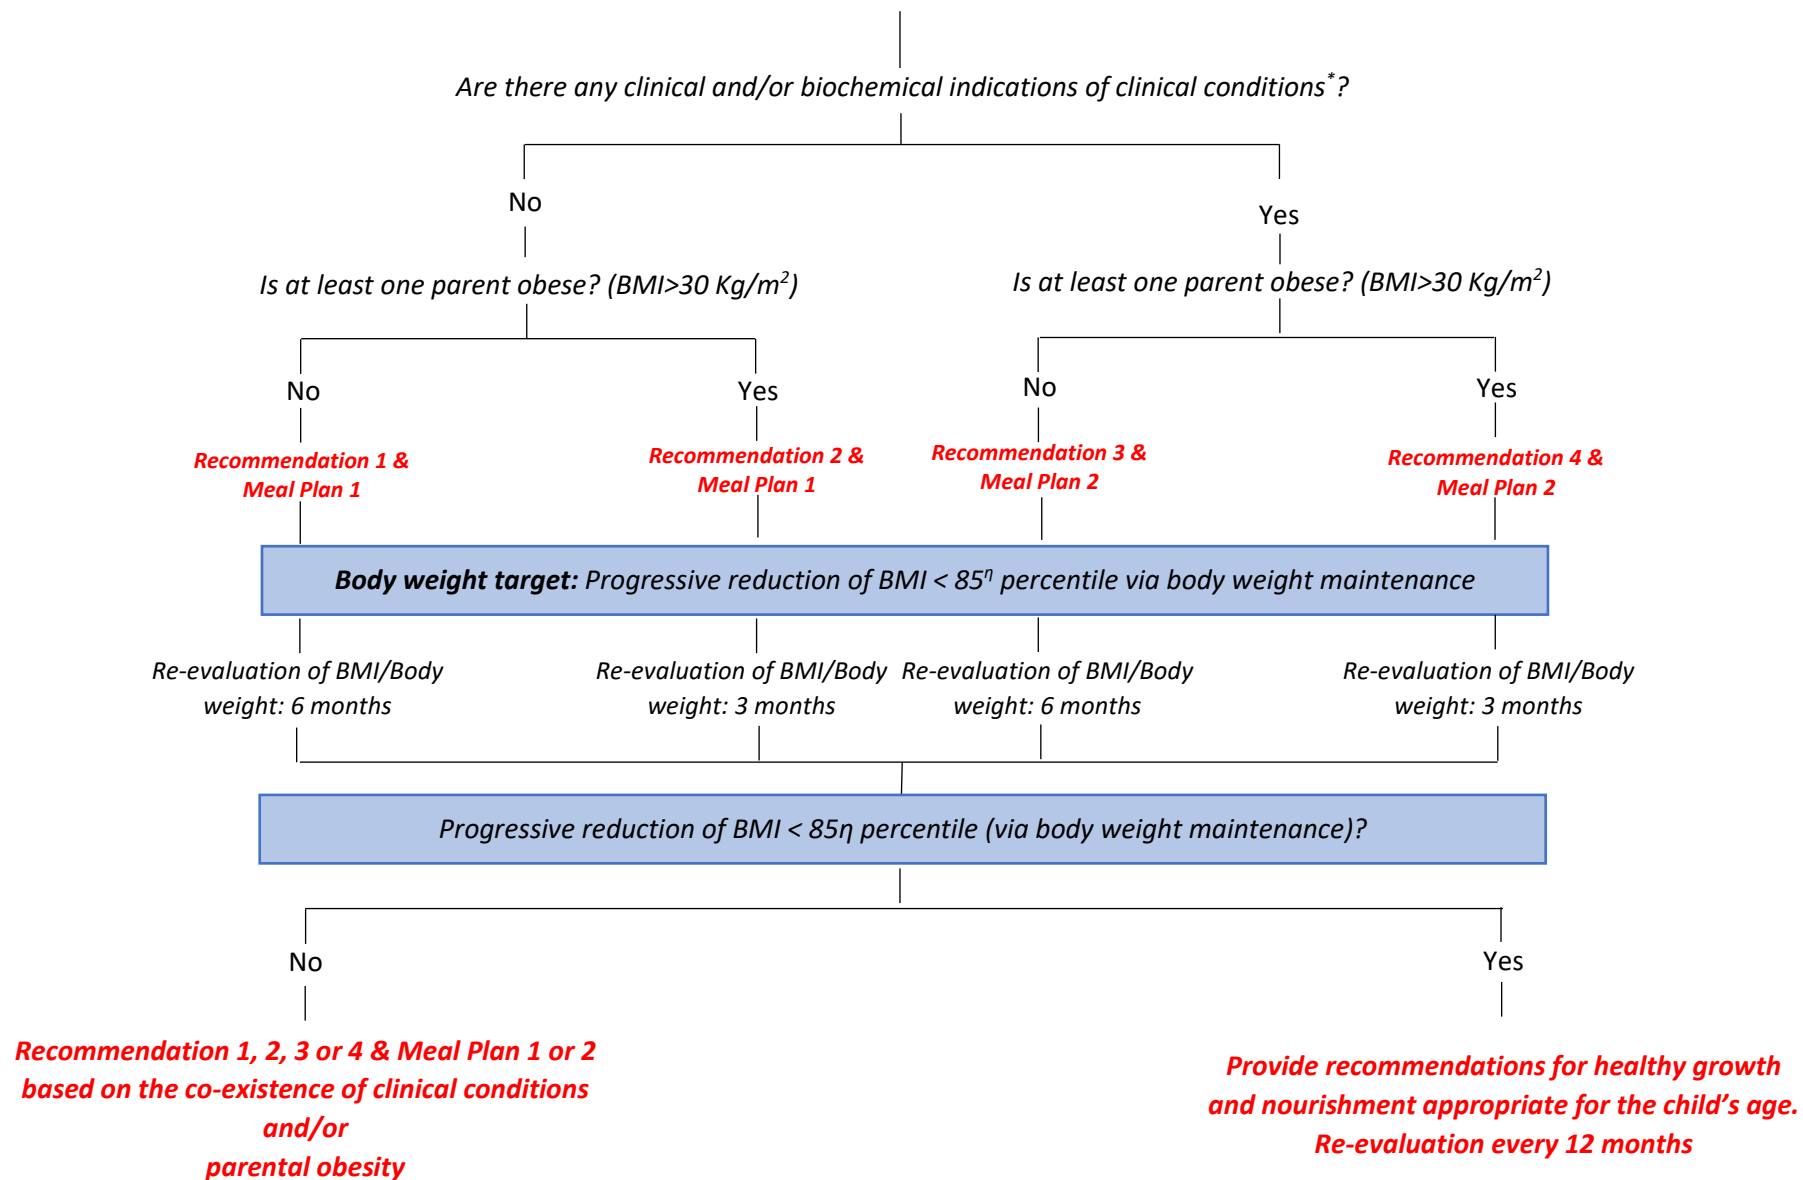

\*Clinical conditions include metabolic disorders, such as hyperglycaemia, insulin resistance, dyslipidaemias, hypertension based on indications stemming from the clinical examination of the child (e.g. increased blood pressure levels etc.) and on the elevated levels of biochemical indices available to the health professionals or to the family.

## Step 5 (Continue from Step 1 for obese children)

**Obese children (BMI  $\geq$  95th percentile)**

Are there any clinical and/or biochemical indications of clinical conditions\*?

No

Yes

Is at least one parent obese? (BMI  $>30$  Kg/m<sup>2</sup>)

Is at least one parent obese? (BMI  $>30$  Kg/m<sup>2</sup>)

No

Yes

No

Yes

**2-5 years old:**

**Recommendation 1 & Meal Plan 1**

**Recommendation 2 & Meal Plan 1**

**Recommendation 3 & Meal Plan 2**

**Recommendation 4 & Meal Plan 2**

**6-15 years old:**

**Recommendation 2 & Meal Plan 3**

**Recommendation 3 & Meal Plan 4**

**Recommendation 4 & Meal Plan 4**

**Body weight target:** Progressive reduction of BMI  $< 85^{\text{th}}$  percentile, via body weight maintenance in 2-5 year-old children with BMI  $\geq 95^{\text{th}}$  percentile and via body weight maintenance or mild weight loss for 6-15 year-old children/adolescents with BMI between  $> 95^{\text{th}}$  percentile

Re-evaluation of BMI/Body weight: 6 months

Re-evaluation of BMI/Body weight: 3 months

Re-evaluation of BMI/Body weight: 6 months

Re-evaluation of BMI/Body weight: 6 months

Progressive reduction of BMI  $< 85^{\text{th}}$  percentile (via body weight maintenance)?

No

Yes

**Recommendation 1, 2, 3 or 4 & Meal Plan 1, 2, 3 or 4 based on the co-existence of clinical conditions and/or parental obesity**

**Provide recommendations for healthy growth and nourishment appropriate for the child's age. Re-evaluation every 12 months**

\*Clinical conditions include metabolic disorders, such as hyperglycaemia, insulin resistance, dyslipidaemias, hypertension based on indications stemming from the clinical examination of the child (e.g. increased blood pressure levels etc.) and on the elevated levels of biochemical indices available to the health professionals or to the family.
